# Supplementary material
Source: PubMed Central journal article supplement (PMC6933817)
Supplement: nn9b07626_si_001.pdf [file nn9b07626_si_001.pdf]

# Supporting Information

## **Crystal Structure, Morphology and Surface Termination of Cyan-Emissive, 6-Monolayers-Thick CsPbBr<sub>3</sub> Nanoplatelets from X-Ray Total Scattering**

Federica Bertolotti,<sup>a,#\*</sup> Georgian Nedelcu,<sup>b,c#</sup> Anna Vivani,<sup>a</sup> Antonio Cervellino,<sup>d</sup> Norberto Masciocchi,<sup>a</sup> Antonietta Guagliardi<sup>e\*</sup> and Maksym V. Kovalenko<sup>b,c,\*</sup>

<sup>a</sup> Dipartimento di Scienza e Alta Tecnologia & To.Sca.Lab, Università dell'Insubria, via Valleggio 11, 22100 Como, Italy

<sup>b</sup> Department of Chemistry and Applied Biosciences, ETH Zürich, Vladimir-Prelog-Weg 1, Zürich 8093, Switzerland

<sup>c</sup> Laboratory for Thin Films and Photovoltaics, Empa–Swiss Federal Laboratories for Materials Science and Technology, Dübendorf 8600, Switzerland

<sup>d</sup> SLS, Laboratory for Synchrotron Radiation - Condensed Matter, Paul Scherrer Institut, 5232 Villigen, Switzerland

<sup>e</sup> Istituto di Cristallografia & To.Sca.Lab, Consiglio Nazionale delle Ricerche, via Valleggio 11, 22100 Como, Italy

\* F. Bertolotti. E-mail: [federica.bertolotti@uninsubria.it](mailto:federica.bertolotti@uninsubria.it)

\* A. Guagliardi. E-mail: [antonella.guagliardi@ic.cnr.it](mailto:antonella.guagliardi@ic.cnr.it)

\*M.V. Kovalenko. E-mail: [mvkovalenko@ethz.ch](mailto:mvkovalenko@ethz.ch)

### **Supplementary Figures**

Figures S1-S10

### **Supplementary Tables**

Tables S1

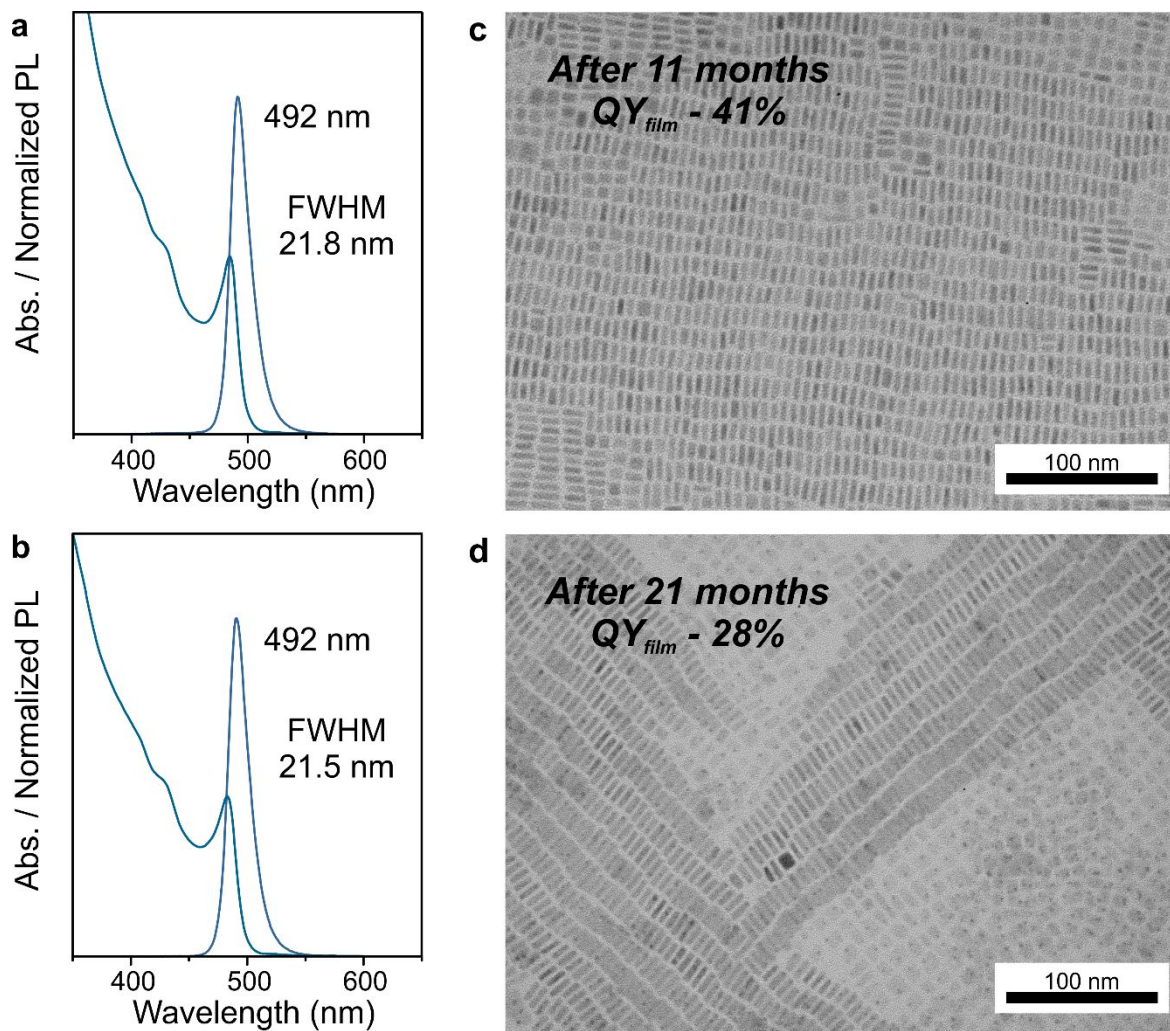

**Figure S1.** Absorbance and PL spectra of CsPbBr<sub>3</sub> NPLs aged for: **(a)** 11 months and **(b)** 21 months, respectively, showing the preservation of the absorbance and PL peak positions; Low-resolution TEM micrographs of the aged CsPbBr<sub>3</sub> NPLs proving the conservation of the morphology after **(c)** 11 months and **(d)** 21 months, respectively.

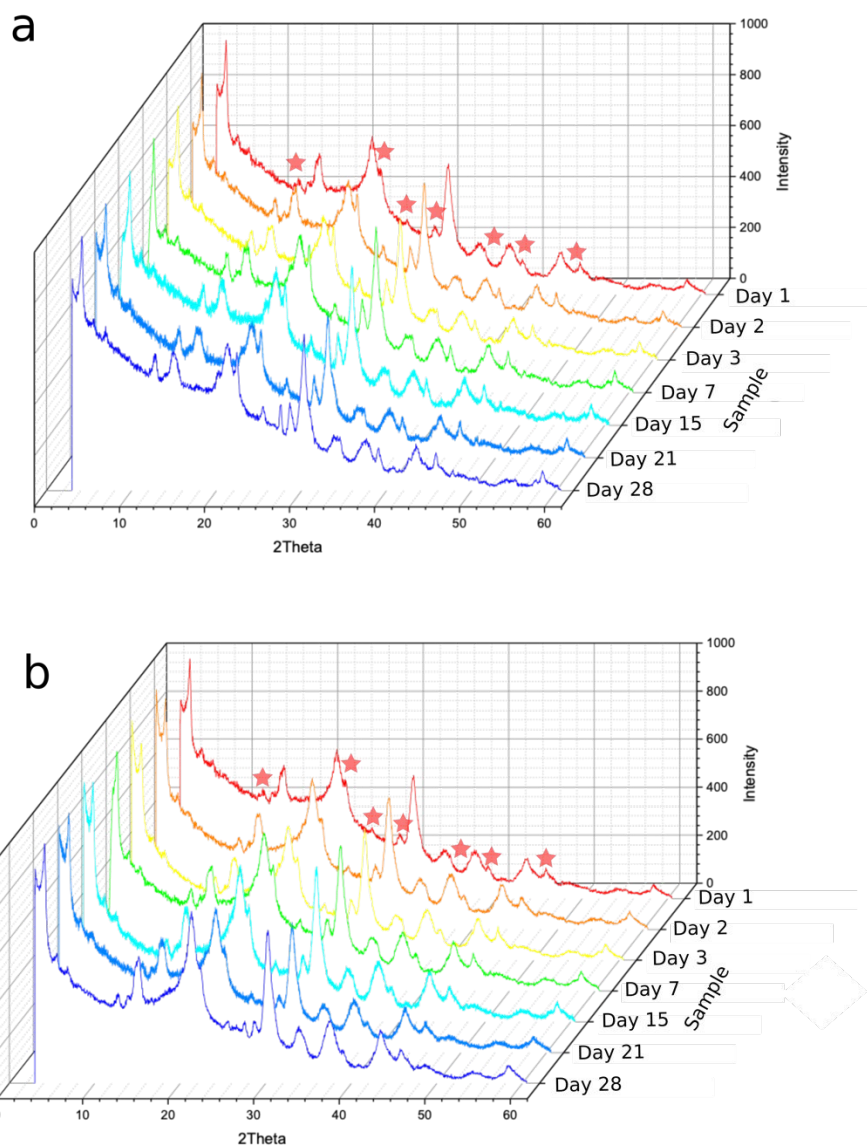

**Figure S2.** Monitoring the time evolution of Cs<sub>4</sub>PbBr<sub>6</sub> (impurity phase) with laboratory X-ray diffraction (XRD) data of **(a)** a CsPbBr<sub>3</sub> NPLs film deposited immediately after synthesis and **(b)** CsPbBr<sub>3</sub> NPLs films deposited each time just before the measurement from the same solution. The peaks of Cs<sub>4</sub>PbBr<sub>6</sub> are highlighted by red stars. As shown in **(a)**, after CsPbBr<sub>3</sub> deposition the impurity amount increase from 5% w/w (day 1) up to 11% w/w (day 15) and it appears to be stable from then on. On the other hand, the solution in **(b)** shows approximately the same amount of Cs<sub>4</sub>PbBr<sub>6</sub> after each deposition, suggesting that the CsPbBr<sub>3</sub> NPLs suspensions are quite stable in their colloidal state.

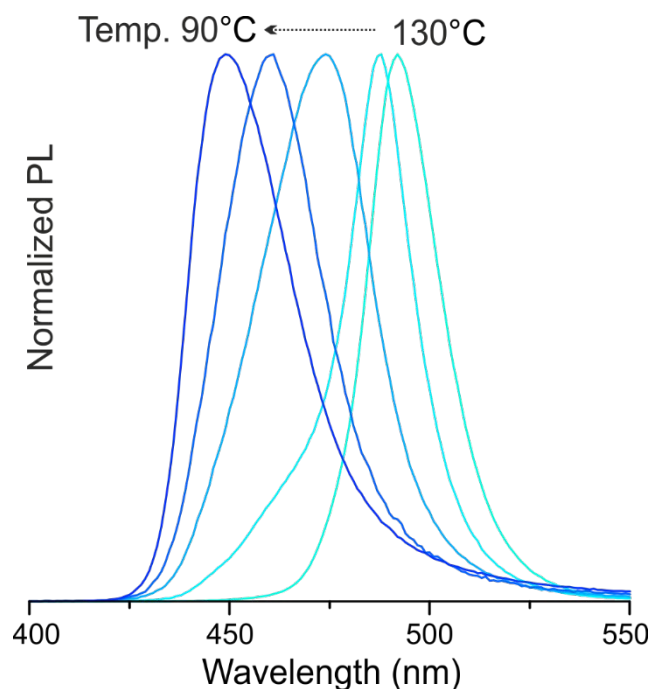

**Figure S3.** Normalized PL spectra of CsPbBr<sub>3</sub> NPLs with emission at 492 nm, 485 nm, 474 nm, 461 nm and 449 nm obtained by injecting Cs-oleate at 130 °C, 120 °C, 110 °C, 100 °C, and 90 °C (from right to left).

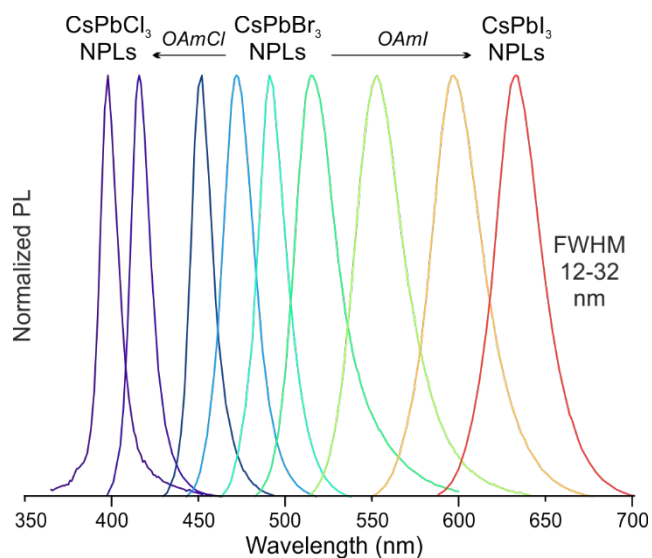

**Figure S4.** Normalized PL spectra for anion-exchange reactions in CsPbBr<sub>3</sub> NPLs (PL = 492 nm) using oleylammonium halides (OAmX) as halide sources. The tunability of the PL peak can be easily achieved over the entire UV-VIS spectral region by modulating the ratio between the parent NPLs and the halide source.

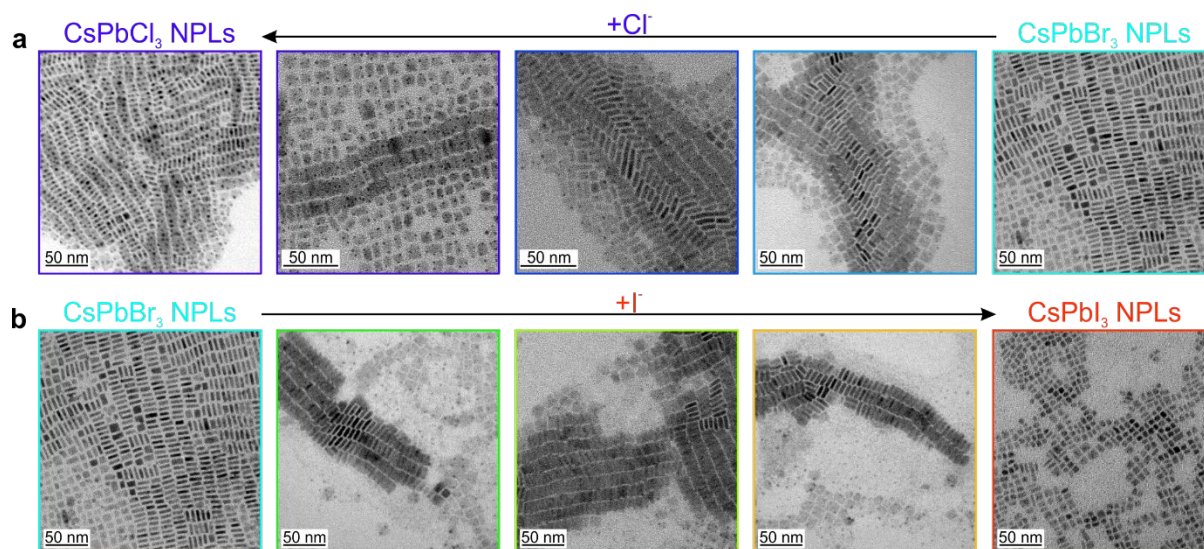

**Figure S5.** Transmission electron microscopy (TEM) images of CsPbX<sub>3</sub> NPLs after treatment with different amounts of (a) chloride and (b) iodide anions showing the size and shape preservation upon forming mixed-halide CsPbBr<sub>3-x</sub>Cl<sub>x</sub> and CsPbBr<sub>3-x</sub>I<sub>x</sub>, to fully exchanged CsPbCl<sub>3</sub> and CsPbI<sub>3</sub> NPLs.

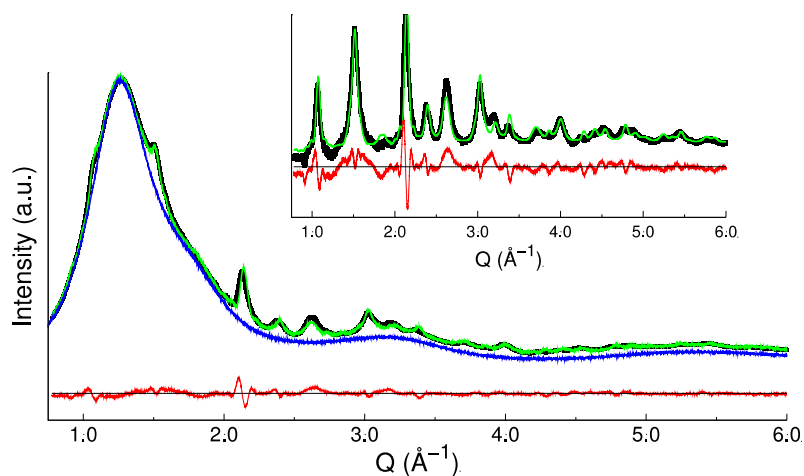

**Figure S6.** Synchrotron WAXTS data (black dots) of colloidal CsPbBr<sub>3</sub> NPLs in toluene (blue trace) and DSE best fit (green solid curve) obtained by using the cubic (*Pm-3m*) perovskite crystal structure (GoF=3.08). Inset: solvent-subtracted WAXTS data and DSE best fit.

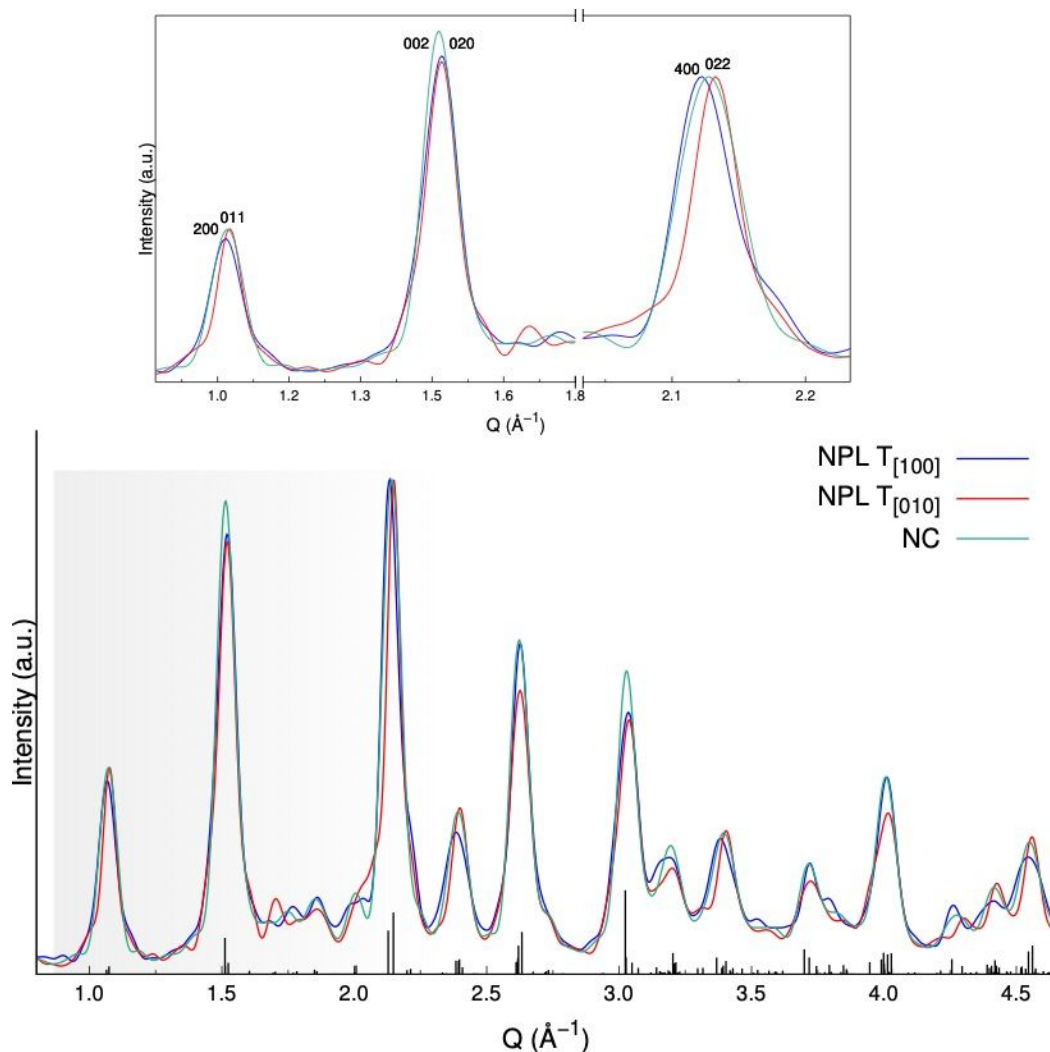

**Figure S7.** DSE simulations performed on  $\text{CsPbBr}_3$  NPLs of  $10 \times 10 \times 3.5 \text{ nm}^3$  in size using the two different structure-morphology configurations ( $T_{[100]}$  and  $T_{[010]}$ ), as described in the main text. The DSE simulation from an isotropic nanocrystal (NC) of equivalent volume is provided for comparison. Inset: blow-up of a reduced  $Q$ -range showing how the different structure-morphology relationships cause peak shifts in the XRD patterns as a consequence of different intensity ratios among the non-equivalent reflections below each diffraction peak (very broad and not resolved, in case of NPLs or NCs). These features make it possible discriminating among the different configurations through DSE models and thus determine  $\text{CsPbBr}_3$  NPLs structure, morphology, and their mutual relationship.

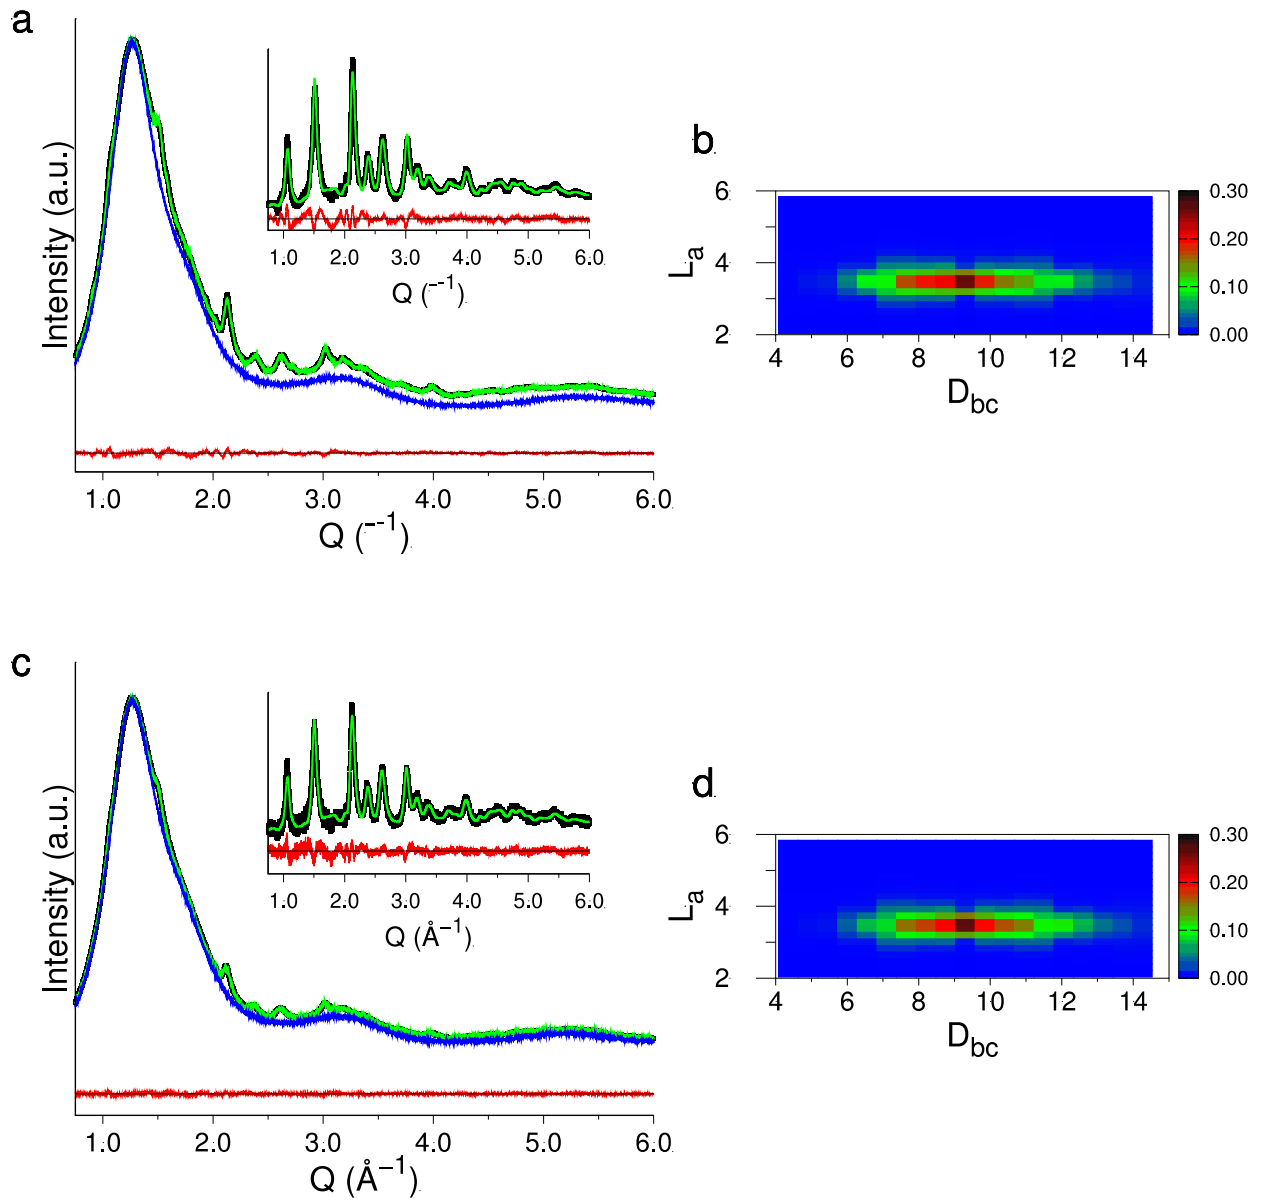

**Figure S8.** (a, c) Synchrotron WAXTS data (black dots) of colloidal CsPbBr<sub>3</sub> NPLs (different syntheses from the one reported in Figure 4 and 5 of the main text) in toluene (blue trace) and DSE best fit (green solid curve) obtained using the  $T_{[100]}$  model. Insets: DSE best fit of the solvent-subtracted experimental data. (b, d) 2D maps of the bivariate log-normal size distribution functions in the  $L_a$ ,  $D_{bc}$  coordinates, ( $L_a$  being the size along the thickness and  $D_{bc}$  the diameter of the circle of equivalent area to the NPLs basal plane), corresponding to the DSE best fit shown in (a, c). The refined number-based average size and standard deviation of the log-normal distribution functions along the two directions are: (b)  $D_{bc} = 9.83$  nm ( $\sigma_{bc}/D_{bc} = 20\%$ ) and  $L_a = 3.50$  nm ( $\sigma_a/L_a = 3.0\%$ ); (d)  $D_{bc} = 9.74$  nm ( $\sigma_{bc}/D_{bc} = 22\%$ ) and  $L_a = 3.50$  nm ( $\sigma_a/L_a = 3.0\%$ ), respectively.

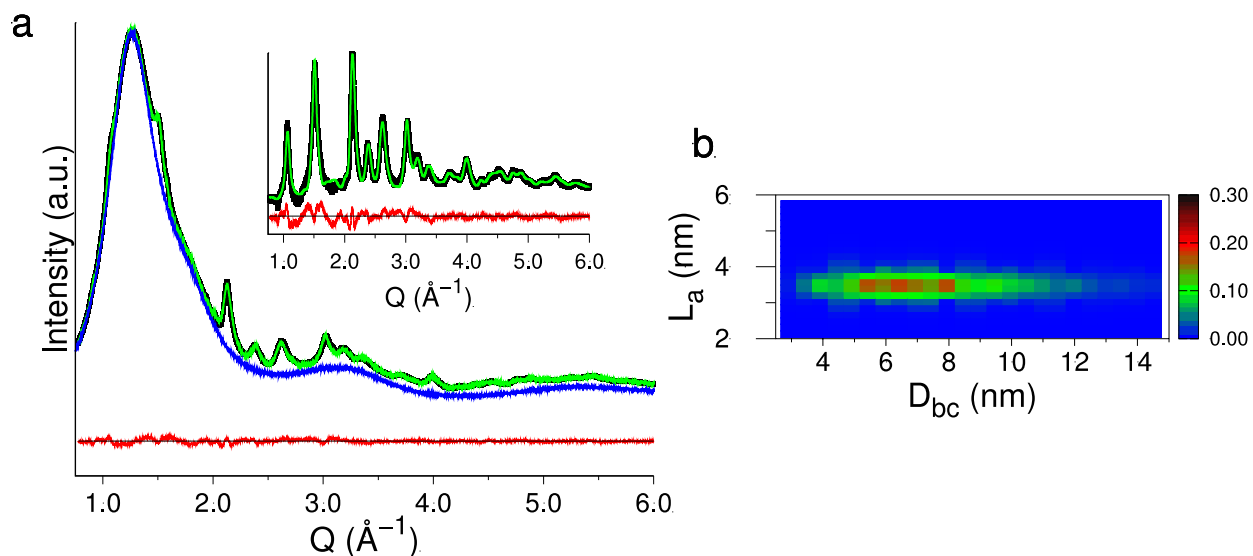

**Figure S9.** (a) DSE best fit corresponding to the minimum of the GoF isosurface (GoF=1.62) shown in Figure 4a of the main text for the  $T_{[100]}$  configuration: experimental data of colloidal  $\text{CsPbBr}_3$  NPLs (black dots) in toluene (blue trace), DSE simulation (green curve) and profile difference (red line). Inset: DSE best fit of the solvent-subtracted data. (b) 2D map of the bivariate log-normal size distribution function in the  $L_a, D_{bc}$  coordinates ( $L_a, D_{bc}$  as in Figure S8), corresponding to the DSE best fit shown in (a). The refined number-based average size and standard deviation are  $D_{bc} = 9.0$  nm ( $\sigma_{bc}/D_{bc} = 22\%$ ) and  $L_a = 3.5$  nm ( $\sigma_a/L_a = 2.8\%$ ).



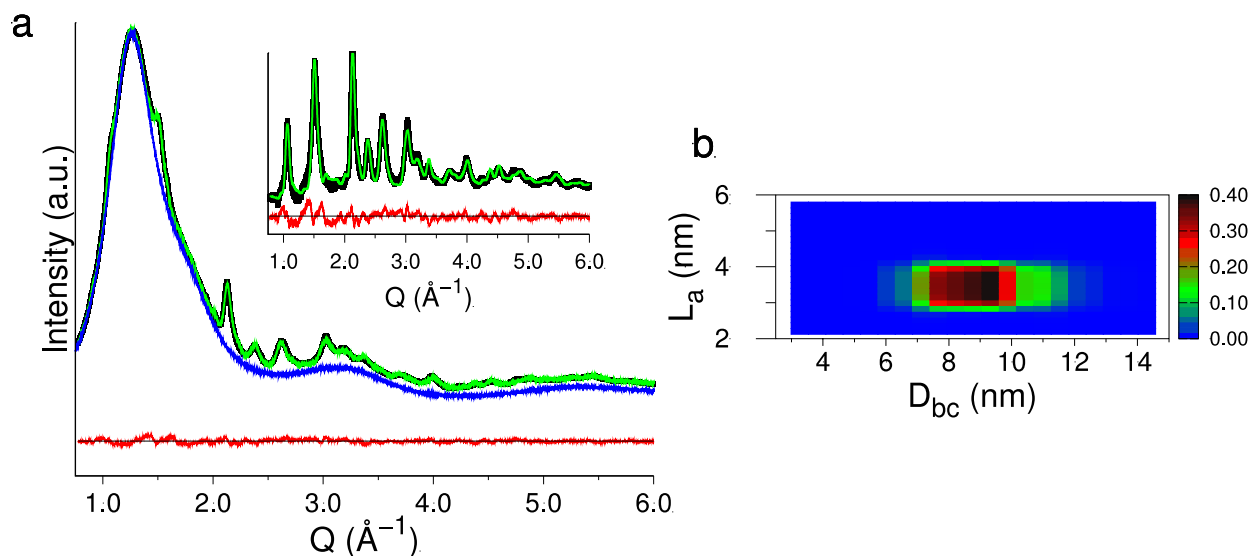

**Figure S10.** (a) DSE best fit corresponding to the minimum of the GoF isosurface (GoF=1.76) shown in Figure 4b of the main text for the  $T_{[010]}$  configuration: experimental data of colloidal  $\text{CsPbBr}_3$  NPLs (black dots) in toluene (blue trace), DSE simulation (green curve) and profile difference (red line). Inset: DSE best fit of the solvent-subtracted data. (b) 2D map of the bivariate log-normal size distribution function in the  $L_a$ ,  $D_{bc}$  coordinates ( $L_a$ ,  $D_{bc}$  as in Figure S8), corresponding to the DSE best fit shown in (a). The refined number-based average size and standard deviation are:  $D_{ac} = 9.01$  nm ( $\sigma_{ac}/D_{ac} = 14\%$ ) and  $L_b = 3.50$  nm ( $\sigma_b/L_b = 2.0\%$ )

**Table S1.** Summary of anion exchange reactions and their PL features.

| <b>CsPbBr<sub>3</sub> NPLs<br/>(5 mg/mL in<br/>toluene)</b> | <b>OAmCl 1.5 mM<br/>(mL)</b> | <b>OAmI 1.5 mM<br/>(mL)</b> | <b>PL emission<br/>(nm)</b> | <b>FWHM<br/>(nm)</b> |
|-------------------------------------------------------------|------------------------------|-----------------------------|-----------------------------|----------------------|
| 0.2 mL                                                      | 3.70                         | -                           | 398                         | 12.37                |
| 0.2 mL                                                      | 3.10                         | -                           | 406                         | 14.02                |
| 0.2 mL                                                      | 2.50                         | -                           | 416                         | 14.85                |
| 0.2 mL                                                      | 1.50                         | -                           | 430                         | 15.97                |
| 0.2 mL                                                      | 0.70                         | -                           | 452                         | 16.37                |
| 0.2 mL                                                      | 0.30                         | -                           | 472                         | 17.71                |
| 0.2 mL                                                      | -                            | -                           | 492                         | 18.33                |
| 0.2 mL                                                      | -                            | 0.10                        | 515                         | 22.13                |
| 0.2 mL                                                      | -                            | 0.35                        | 550                         | 24.71                |
| 0.2 mL                                                      | -                            | 0.60                        | 575                         | 27.90                |
| 0.2 mL                                                      | -                            | 0.85                        | 600                         | 31.87                |
| 0.2 mL                                                      | -                            | 1.60                        | 632                         | 32.78                |
